# Supplementary material for: Rapid low-cost assembly of modular microvessel-on-a-chip with benchtop xurography
Source: Royal Society of Chemistry journal article supplement (doi:10.1039/d4lc00565a), 2024-01-01
Supplement: d4lc00565a1.pdf [file d4lc00565a1.pdf]

| <b>Description</b>                                                         | <b>Corresponding Step in Fig. 1A</b> | <b>Work Time (mins)</b> | <b>Wait Time (mins)</b> |
|----------------------------------------------------------------------------|--------------------------------------|-------------------------|-------------------------|
| Mix PDMS and degas*                                                        |                                      | 5                       | 30                      |
| Fill PDMS into needles with syringe†                                       |                                      | 5                       | 30                      |
| Break needles and cut PDMS rods of equal lengths                           |                                      | 15                      | 0                       |
| Spin coat PDMS onto silicon wafers†                                        |                                      | 10                      | 240                     |
| Peel PDMS layers from wafers and cut into rectangular sheets               |                                      | 15                      | 0                       |
| Make channel cut via xurography on a 400- $\mu$ m layer                    | Step 2                               | 10                      | 0                       |
| Bond the 400- $\mu$ m layer with channel to a 250- $\mu$ m layer†          | Step 3                               | 5                       | 5                       |
| Align a 250- $\mu$ m layer to top of assembly and punch inlet/outlet ports | Step 4                               | 10                      | 0                       |
| Bond a 250- $\mu$ m layer below assembly†                                  | Step 5                               | 5                       | 5                       |
| Use 4-mm biopsy punch to cut central gel chamber                           | Step 6                               | 5                       | 0                       |
| Bond the layer from Step 4 to top of assembly†                             | Step 7                               | 5                       | 5                       |
| Use 1.5-mm biopsy punch to cut gel ports                                   | Step 8                               | 5                       | 0                       |
| Add PDMS rods to assembly                                                  | Step 9                               | 20                      | 0                       |
| Bond assembly to glass slides†                                             | Step 10                              | 5                       | 5                       |
| <b>Sub-total Time for Device Fabrication</b>                               |                                      | <b>120</b>              | <b>320</b>              |
| Prepare and pipette hydrogel to gel chamber of device‡                     | Step 11                              | 30                      | 30                      |
| Remove sacrificial PDMS rods to reveal cylindrical lumen holds             | Step 12                              | 20                      | 0                       |
| <b>Sub-total Time for Hydrogel and Lumen Formation</b>                     |                                      | <b>50</b>               | <b>30</b>               |
| <b>Total Time</b>                                                          |                                      | <b>170</b>              | <b>350</b>              |

**Supplementary Table 1:** Description of steps and time to fabricate a batch of 20 open lumen microdevices. 20 devices can be made in approximately 2 hours of labor, i.e., 6 minutes of labor per device. Premade devices can be stored at room temperature indefinitely in petri dishes until ready to deploy. We recommend completing hydrogel steps on the day prior to microvessel seeding, which adds approximately 1 hour of additional labor. Wait Time is due to \*degassing, †storage in the 65°C oven for curing or bonding, and ‡hydrogel polymerization. Inter-batch steps can be performed in parallel during Wait Times to significantly increase throughput.
